# Supplementary material for: Survival benefit of surgical resection for stage IV gastric cancer: A SEER-based propensity score-matched analysis
Source: PubMed Central journal article supplement (PMC9640680; doi:10.3389/fsurg.2022.927030), 2022-10-25
Supplement: Datasheet3.pdf [file Datasheet3.pdf]

**Table 1. Baseline characteristics before propensity matching scores, showing statistical comparisons between the CDS and no-CDS groups.**

|                               | CDS<br>(N=514) | No-CDS<br>(N=5770) | Overall<br>(N=6284) | $\chi^2$ | p      |
|-------------------------------|----------------|--------------------|---------------------|----------|--------|
| <b>Age</b>                    |                |                    |                     | 3.521    | 0.172  |
| ≤49                           | 61 (11.9%)     | 644 (11.2%)        | 705 (11.2%)         |          |        |
| 50-64                         | 186(36.2%)     | 1884(32.7%)        | 2070(32.9%)         |          |        |
| ≥65                           | 267 (51.9%)    | 3242 (56.2%)       | 3509 (55.8%)        |          |        |
| <b>Sex</b>                    |                |                    |                     | 0.972    | 0.324  |
| Female                        | 165 (32.1%)    | 1726 (29.9%)       | 1891 (30.1%)        |          |        |
| Male                          | 349 (67.9%)    | 4044 (70.1%)       | 4393 (69.9%)        |          |        |
| <b>Race</b>                   |                |                    |                     | 26.668   | <0.001 |
| White                         | 341 (66.3%)    | 4326 (75.0%)       | 4667 (74.3%)        |          |        |
| Black                         | 71 (13.8%)     | 739 (12.8%)        | 810 (12.9%)         |          |        |
| Other                         | 100 (19.5%)    | 687 (11.9%)        | 787 (12.5%)         |          |        |
| Unknown                       | 2 (0.4%)       | 18 (0.3%)          | 20 (0.3%)           |          |        |
| <b>Marital status</b>         |                |                    |                     | 6.569    | 0.161  |
| Divorced                      | 41 (8.0%)      | 503 (8.7%)         | 544 (8.7%)          |          |        |
| Married                       | 313 (60.9%)    | 3322 (57.6%)       | 3635 (57.8%)        |          |        |
| Single                        | 61 (11.9%)     | 893 (15.5%)        | 954 (15.2%)         |          |        |
| Widowed                       | 59 (11.5%)     | 680 (11.8%)        | 739 (11.8%)         |          |        |
| Unknown                       | 40 (7.8%)      | 372 (6.4%)         | 412 (6.6%)          |          |        |
| <b>Primary Site</b>           |                |                    |                     | 148.950  | <0.001 |
| Body of stomach               | 40 (7.8%)      | 488 (8.5%)         | 528 (8.4%)          |          |        |
| Overlapping lesion of stomach | 48 (9.3%)      | 378 (6.6%)         | 426 (6.8%)          |          |        |
| Stomach                       | 75 (14.6%)     | 953 (16.5%)        | 1028 (16.4%)        |          |        |
| Cardia and fundus of stomach  | 140 (27.2%)    | 2756 (47.8%)       | 2896 (46.1%)        |          |        |
| Gastric antrum and pylorus    | 149 (29.0%)    | 730 (12.7%)        | 879 (14.0%)         |          |        |
| Greater and lesser curvature  | 62 (12.1%)     | 465 (8.1%)         | 527 (8.4%)          |          |        |
| <b>Grade</b>                  |                |                    |                     | 69.774   | <0.001 |
| Grade I                       | 4 (0.8%)       | 125 (2.2%)         | 129 (2.1%)          |          |        |
| Grade II                      | 128 (24.9%)    | 1342 (23.3%)       | 1470 (23.4%)        |          |        |
| Grade III                     | 318 (61.9%)    | 3046 (52.8%)       | 3364 (53.5%)        |          |        |
| Grade IV                      | 17 (3.3%)      | 52 (0.9%)          | 69 (1.1%)           |          |        |
| Unknown                       | 47 (9.1%)      | 1205 (20.9%)       | 1252 (19.9%)        |          |        |
| <b>T</b>                      |                |                    |                     | 543.500  | <0.001 |
| T0                            | 0 (0%)         | 33 (0.6%)          | 33 (0.5%)           |          |        |
| T1                            | 48 (9.3%)      | 1185 (20.5%)       | 1233 (19.6%)        |          |        |
| T2                            | 28 (5.4%)      | 174 (3.0%)         | 202 (3.2%)          |          |        |
| T3                            | 173 (33.7%)    | 730 (12.7%)        | 903 (14.4%)         |          |        |

|                        |               |               |              |         |        |
|------------------------|---------------|---------------|--------------|---------|--------|
| T4                     | 216 (42.0%)   | 866 (15.0%)   | 1082 (17.2%) |         |        |
| Tx                     | 49 (9.5%)     | 2782 (48.2%)  | 2831 (45.1%) |         |        |
| <b>N</b>               |               |               |              | 849.840 | <0.001 |
| N0                     | 101 (19.6%)   | 2036 (35.3%)  | 2137 (34.0%) |         |        |
| N1                     | 140 (27.2%)   | 2189 (37.9%)  | 2329 (37.1%) |         |        |
| N2                     | 110 (21.4%)   | 258 (4.5%)    | 368 (5.9%)   |         |        |
| N3                     | 134 (26.1%)   | 170 (2.9%)    | 304 (4.8%)   |         |        |
| Nx                     | 29 (5.6%)     | 1117 (19.4%)  | 1146 (18.2%) |         |        |
| <b>Chemotherapy</b>    |               |               |              | 0.429   | 0.512  |
| No                     | 221 (43.0%)   | 2389 (41.4%)  | 2610 (41.5%) |         |        |
| Yes                    | 293 (57.0%)   | 3381 (58.6%)  | 3674 (58.5%) |         |        |
| <b>Survival months</b> |               |               |              |         |        |
| Mean (SD)              | 16.0 (19.4)   | 8.64 (12.6)   | -            | 329.13  | <0.001 |
| Median [Min, Max]      | 9.00 [0, 103] | 4.00 [0, 107] | -            |         |        |

**Table 2. Baseline characteristics after propensity matching scores, showing statistical comparisons between the CDS and no-CDS groups.**

|                        | <b>CDS</b>     | <b>No-CDS</b>  | <b>Overall</b> | $\chi^2$ | <b>p</b> |
|------------------------|----------------|----------------|----------------|----------|----------|
|                        | <b>(N=432)</b> | <b>(N=432)</b> | <b>(N=864)</b> |          |          |
| <b>Age</b>             |                |                |                | 3.119    | 0.210    |
| ≤49                    | 50 (11.6%)     | 35 (8.1%)      | 85 (9.8%)      |          |          |
| 50-64                  | 153 (35.4%)    | 165 (38.2%)    | 318(36.8%)     |          |          |
| ≥65                    | 229 (53.0%)    | 232 (53.7%)    | 461(53.4%)     |          |          |
| <b>Sex</b>             |                |                |                | 0.551    | 0.458    |
| Female                 | 135 (31.3%)    | 124 (28.7%)    | 259(30.0%)     |          |          |
| Male                   | 297 (68.8%)    | 308 (71.3%)    | 605(70.0%)     |          |          |
| <b>Race.</b>           |                |                |                | 1.443    | 0.696    |
| White                  | 295 (68.3%)    | 311 (72.0%)    | 606(70.1%)     |          |          |
| Black                  | 59 (13.7%)     | 51 (11.8%)     | 110(12.7%)     |          |          |
| Other                  | 77 (17.8%)     | 69 (16.0%)     | 146(16.9%)     |          |          |
| Unknown                | 1 (0.2%)       | 1 (0.2%)       | 2 (0.2%)       |          |          |
| <b>Marital status.</b> |                |                |                | 2.566    | 0.633    |
| Divorced               | 31 (7.2%)      | 31 (7.2%)      | 62 (7.2%)      |          |          |
| Married                | 262 (60.6%)    | 266 (61.6%)    | 528(61.1%)     |          |          |
| Single                 | 57 (13.2%)     | 43 (10.0%)     | 100(11.6%)     |          |          |

|                               |               |               |            |        |        |
|-------------------------------|---------------|---------------|------------|--------|--------|
| Widowed                       | 48 (11.1%)    | 54 (12.5%)    | 102(11.8%) |        |        |
| Unknown                       | 34 (7.9%)     | 38 (8.8%)     | 72 (8.3%)  |        |        |
| <b>Primary Site</b>           |               |               |            | 2.975  | 0.704  |
| Body of stomach               | 36 (8.3%)     | 28 (6.5%)     | 64 (7.4%)  |        |        |
| Overlapping lesion of stomach | 39 (9.0%)     | 36 (8.3%)     | 75 (8.7%)  |        |        |
| Stomach, NOS                  | 65 (15.0%)    | 72 (16.7%)    | 137(15.9%) |        |        |
| Cardia and fundus of stomach  | 139 (32.2%)   | 151 (35.0%)   | 290(33.6%) |        |        |
| Gastric antrum and pylorus    | 97 (22.5%)    | 99 (22.9%)    | 196(22.7%) |        |        |
| Greater and lesser curvature  | 56 (13.0%)    | 46 (10.6%)    | 102(11.8%) |        |        |
| <b>Grade</b>                  |               |               |            | 2.969  | 0.563  |
| Grade I                       | 4 (0.9%)      | 2 (0.5%)      | 6 (0.7%)   |        |        |
| Grade II                      | 116 (26.9%)   | 105 (24.3%)   | 221(25.6%) |        |        |
| Grade III                     | 259 (60.0%)   | 258 (59.7%)   | 517(59.8%) |        |        |
| Grade IV                      | 6 (1.4%)      | 9 (2.1%)      | 15 (1.7%)  |        |        |
| Unknown                       | 47 (10.9%)    | 58 (13.4%)    | 105(12.2%) |        |        |
| <b>T</b>                      |               |               |            | 4.818  | 0.307  |
| T1                            | 48 (11.1%)    | 50 (11.6%)    | 98 (11.3%) |        |        |
| T2                            | 28 (6.5%)     | 24 (5.6%)     | 52 (6.0%)  |        |        |
| T3                            | 144 (33.3%)   | 165 (38.2%)   | 309(35.8%) |        |        |
| T4                            | 163 (37.7%)   | 136 (31.5%)   | 299(34.6%) |        |        |
| Tx                            | 49 (11.3%)    | 57 (13.2%)    | 106(12.3%) |        |        |
| <b>N</b>                      |               |               |            | 4.524  | 0.340  |
| N0                            | 101 (23.4%)   | 78 (18.1%)    | 179(20.7%) |        |        |
| N1                            | 140 (32.4%)   | 155 (35.9%)   | 295(34.1%) |        |        |
| N2                            | 88 (20.4%)    | 84 (19.4%)    | 172(19.9%) |        |        |
| N3                            | 74 (17.1%)    | 81 (18.8%)    | 155(17.9%) |        |        |
| Nx                            | 29 (6.7%)     | 34 (7.9%)     | 63 (7.3%)  |        |        |
| <b>Chemotherapy</b>           |               |               |            | 3.351  | 0.067  |
| No                            | 174 (40.3%)   | 147 (34.0%)   | 321(37.2%) |        |        |
| Yes                           | 258 (59.7%)   | 285 (66.0%)   | 543(62.8%) |        |        |
| <b>Survival months</b>        |               |               |            |        |        |
| Mean (SD)                     | 16.7 (19.7)   | 10.6 (15.2)   |            | 102.65 | <0.001 |
| Median [Min, Max]             | 10.0 [0, 103] | 5.00 [0, 103] |            |        |        |

**Table 3. Stepwise regression analysis method for automated model screening.**

|                     | HR        | 95%CI                | P       |
|---------------------|-----------|----------------------|---------|
| <b>Age</b>          |           |                      |         |
| <65                 | Reference |                      |         |
| ≥65                 | 1.14534   | 1.01315876-1.2947705 | 0.069   |
| <b>Race</b>         |           |                      |         |
| Black               | Reference |                      |         |
| White               | 1.15323   | 0.96327929-1.3806284 | 0.193   |
| Other               | 1.06197   | 0.85117918-1.3249732 | 0.655   |
| Unknown             | 0.15777   | 0.02983461-0.8343466 | 0.068   |
| <b>Grade</b>        |           |                      |         |
| Grade I-II          | Reference |                      |         |
| Grade III-IV        | 1.42907   | 1.24228609-1.6439408 | <0.001  |
| Unknown             | 1.21551   | 0.98108638-1.5059437 | 0.134   |
| <b>T</b>            |           |                      |         |
| T1                  | Reference |                      |         |
| T2                  | 0.84571   | 0.62794846-1.1389890 | 0.356   |
| T3                  | 0.86839   | 0.70968537-1.0625911 | 0.250   |
| T4                  | 1.13828   | 0.92875278-1.3950809 | 0.295   |
| Tx/NA               | 1.34726   | 1.05125127-1.7266097 | 0.048   |
| <b>Chemotherapy</b> |           |                      |         |
| No                  | Reference |                      |         |
| Yes                 | 0.33161   | 0.29021219-0.3789054 | < 0.001 |
| <b>Surgery</b>      |           |                      |         |
| CDS                 | Reference |                      |         |
| no-CDS              | 1.78204   | 1.57616003-2.0148153 | < 0.001 |

**HR, Hazard ratio; CI, Confidence interval.**
